# Supplementary material for: Lessons from and best practices for the deployment of the Soil Water Isotope Storage System
Source: Copernicus journal article supplement (doi:10.5194/egusphere-2022-1170), 2022-10-28
Supplement: Supplementary file 2 [file egusphere-2022-1170-supplement-version2.zip]

Archive with 3 entries (3 files):
- Supplementary Text .pdf
- Supplementary tables .xlsx
- Supplemental Figures.pdf
